# Supplementary material
Source: PubMed Central journal article supplement (PMC10230446)

Uncropped image for Fig 3H

*BAX*

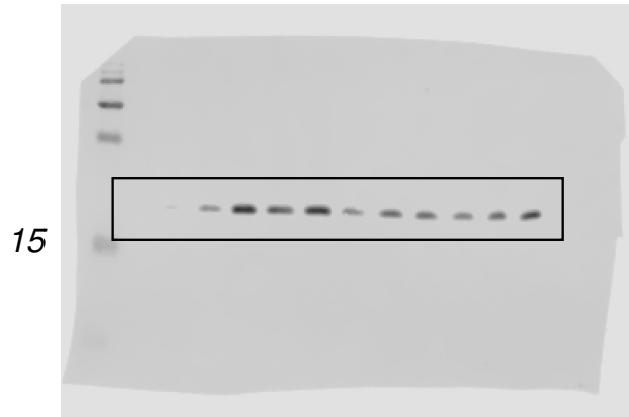

*Cleaved Caspase 3*

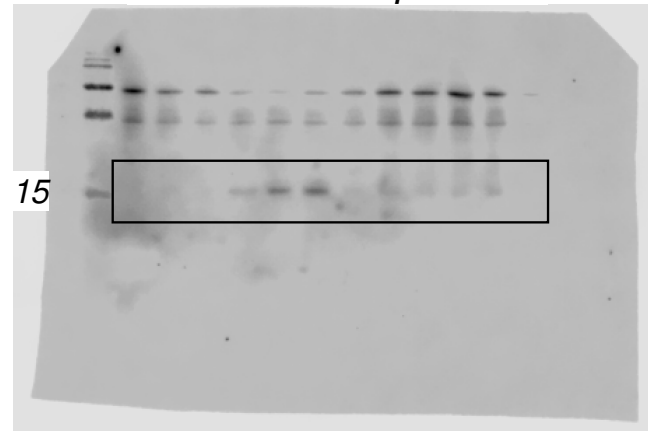

*GAPDH*

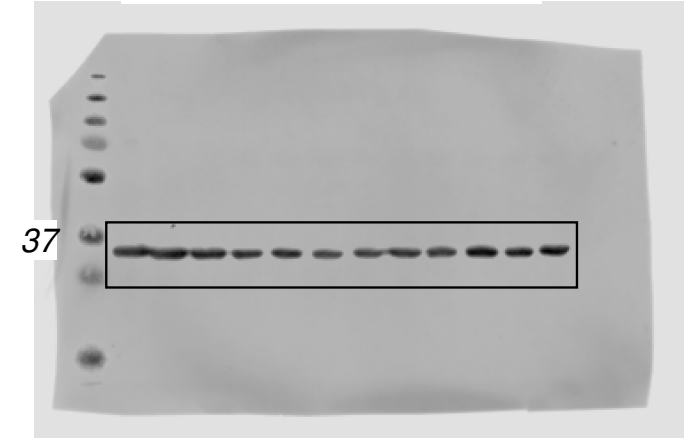

*Uncropped image for Fig 4B*

*GAPDH*

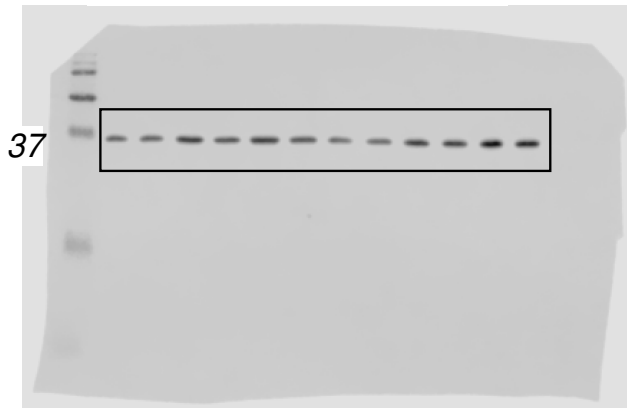

*RIG-I*

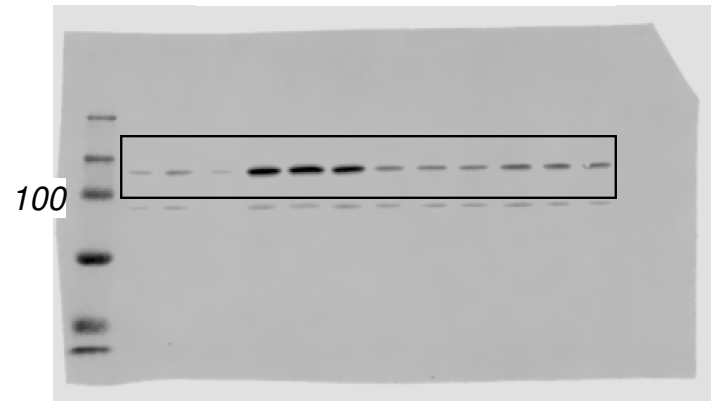

*MAVS*

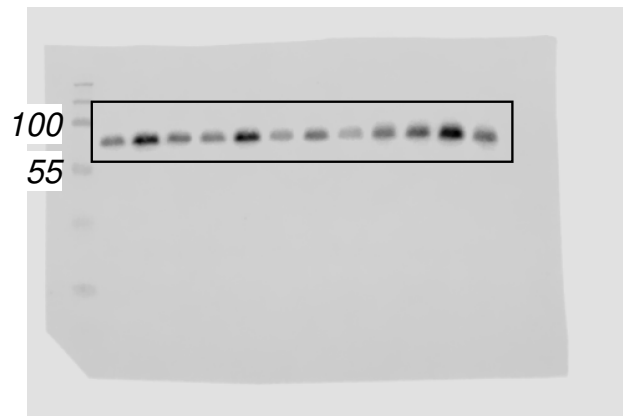

*MAVS aggregation*

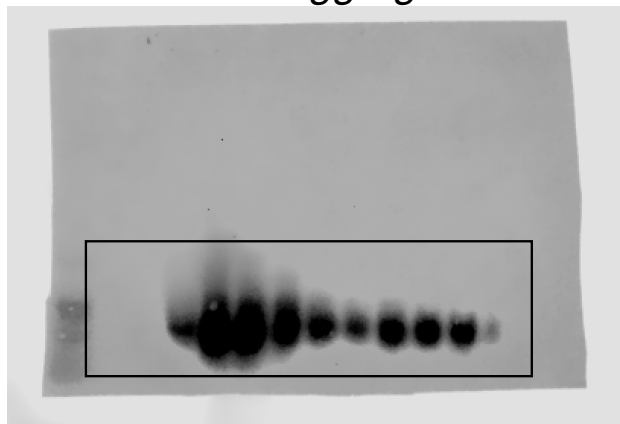

*Uncropped image for Fig 5B*

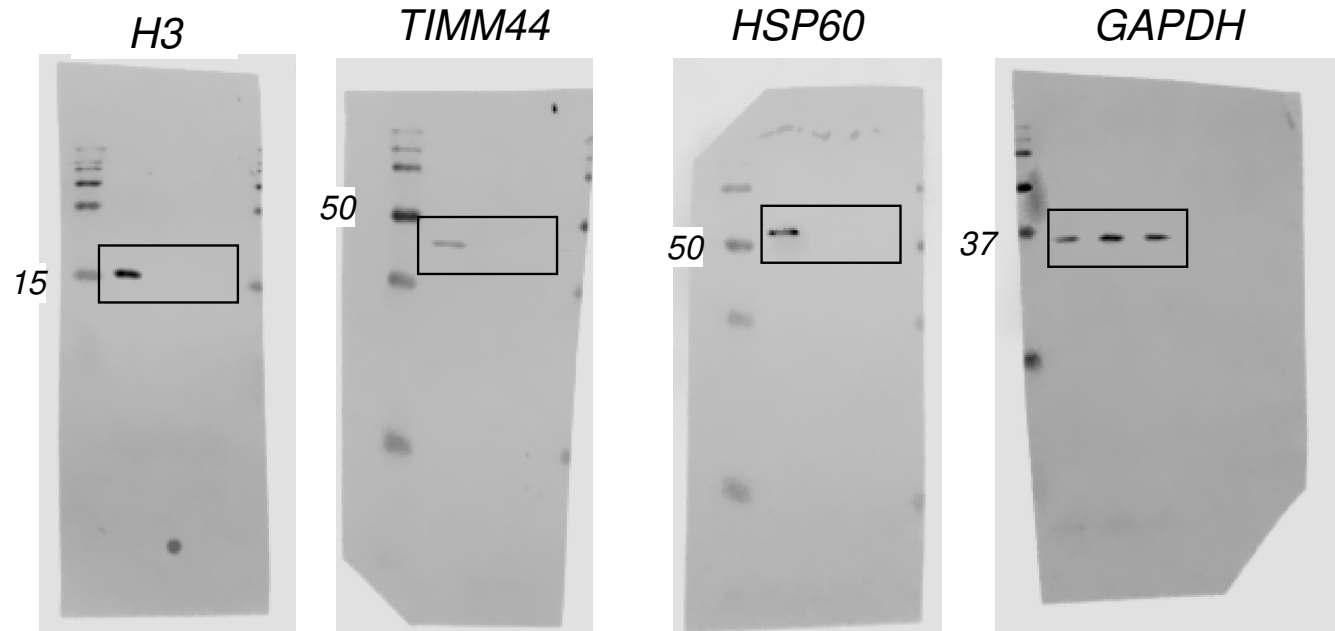

*Uncropped image for Fig 7E*

*RIG-I*

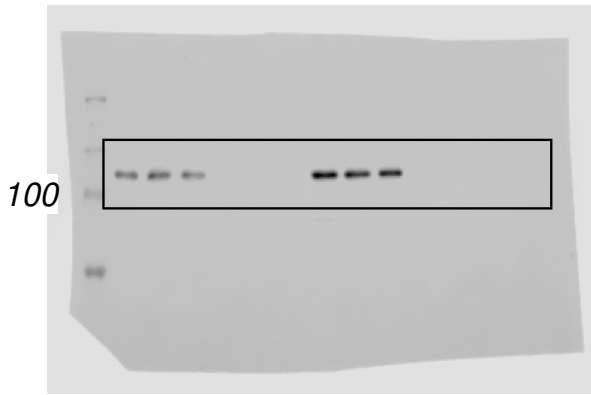

*MAVS*

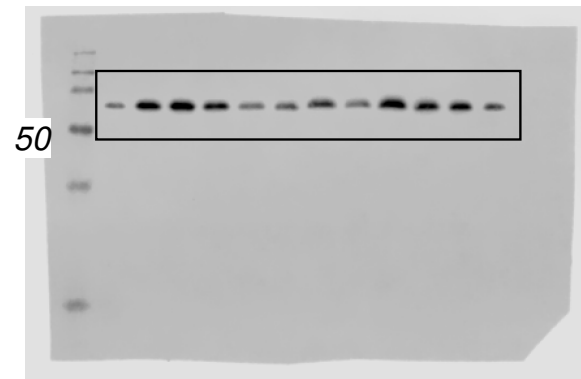

*MAVS  
aggregation*

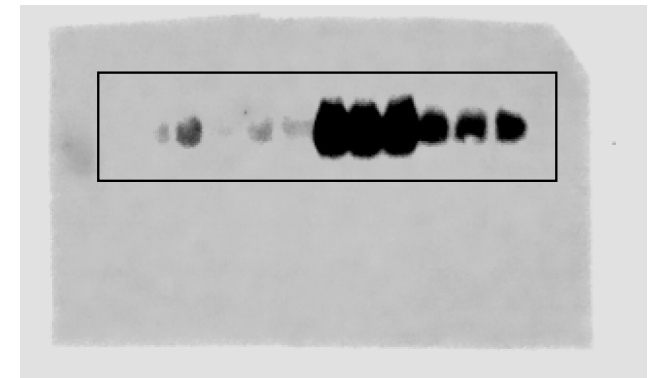

*Cleaved  
Caspase3*

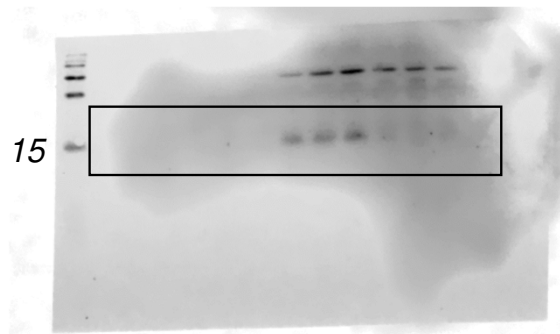

*GAPDH*

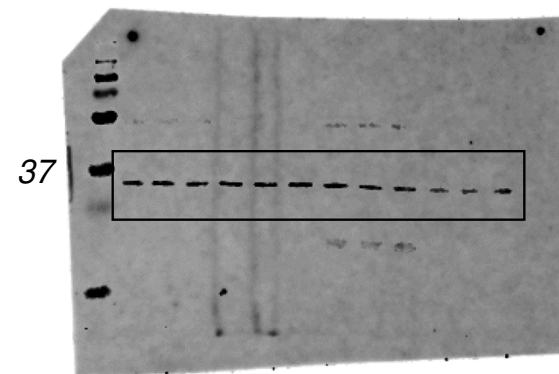

*Uncropped image for Extended Data Fig 9A and 9B*

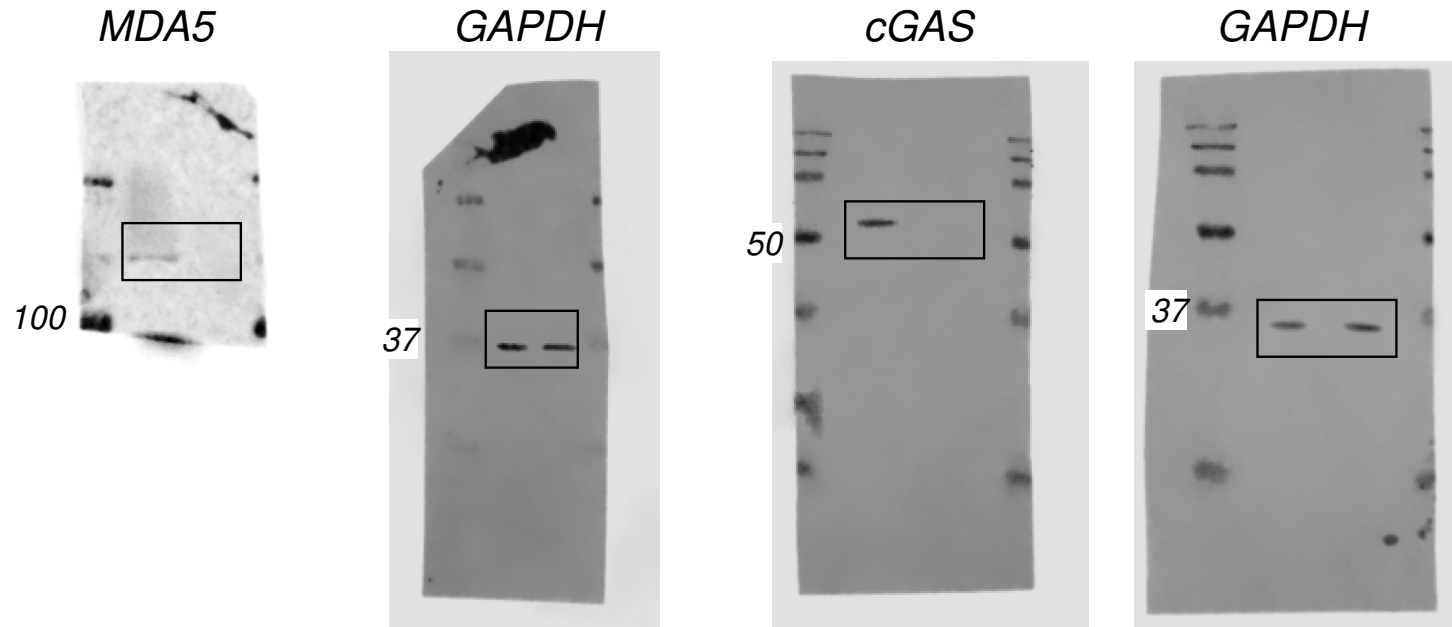

Supplement: NIHMS1894626-supplement-Uncropped_gel_images.pdf [file NIHMS1894626-supplement-Uncropped_gel_images.pdf]
